# Supplementary material for: O2 activation by subnanometer Re–Pt clusters supported on TiO2(110): exploring adsorption sites
Source: Royal Society of Chemistry journal article supplement (doi:10.1039/d4cp01118j), 2024-01-01
Supplement: d4cp01118j1.pdf [file d4cp01118j1.pdf]

## Supplementary Material

O<sub>2</sub> activation on subnanometer Re-Pt clusters supported on  
TiO<sub>2</sub>(110): exploring adsorption sites

Andrés Álvarez-García<sup>1</sup>, Luis M. Molina<sup>2</sup>, and Ignacio L. Garzón<sup>\*,1</sup>

<sup>1</sup>Instituto de Física, Universidad Nacional Autónoma de México, Apartado Postal  
20-364, Ciudad de México 01000, Mexico,

<sup>2</sup>Departamento de Física Teórica, Atómica y Óptica, Universidad de Valladolid, E-  
47011 Valladolid, Spain

## List of Tables

|    |                                                                                                                                                                                                                                                                                                                                                         |   |
|----|---------------------------------------------------------------------------------------------------------------------------------------------------------------------------------------------------------------------------------------------------------------------------------------------------------------------------------------------------------|---|
| S1 | Bader charge analysis of supported $\text{Re}_n\text{Pt}_m$ clusters on $\text{TiO}_2(110)$ . The charge for the cluster atoms is reported both before and after $\text{O}_2$ adsorption, as well as the difference between the two. The charges of the atoms are listed in order, starting with the Re atoms and continuing with the Pt atoms. . . . . | 3 |
| S2 | The adsorption of $\text{O}_2$ on the surface site of Re-Pt clusters supported on $\text{TiO}_2(110)$ . The adsorption mode, adsorption energy ( $E_{ads}$ ), and the height of the Ti atoms binding to the molecule are displayed. . . . .                                                                                                             | 3 |
| S3 | Total charge transferred to the $\text{O}_2$ molecule ( $Q[\text{O}_2]$ ), charge transferred from the cluster to the $\text{O}_2$ molecule ( $\Delta Q[\text{cluster}]$ ), and charge transferred from the surface to the $\text{O}_2$ molecule ( $\Delta Q[\text{surface}]$ ). The Bader charge is shown in e. . . . .                                | 4 |
| S4 | The effect of the temperature ( $T = 300$ K) on reaction energies for the $\text{O}_2$ dissociation on gas-phase Re-Pt clusters . . . . .                                                                                                                                                                                                               | 4 |

## List of Figures

|    |                                                                                                                                                                                                                                                                                                                                                                                                                                                                                                                        |   |
|----|------------------------------------------------------------------------------------------------------------------------------------------------------------------------------------------------------------------------------------------------------------------------------------------------------------------------------------------------------------------------------------------------------------------------------------------------------------------------------------------------------------------------|---|
| S1 | Global minima configurations for gas-phase $\text{Re}_n\text{Pt}_m$ ( $n + m = 5$ ): a) $\text{Re}_5$ , b) $\text{Re}_4\text{Pt}_1$ , c) $\text{Re}_3\text{Pt}_2$ , d) $\text{Re}_2\text{Pt}_3$ , e) $\text{Re}_1\text{Pt}_4$ , f) $\text{Pt}_5$ . The binding energy and magnetization are shown below each structure. . . . .                                                                                                                                                                                        | 5 |
| S2 | Putative global minima(GM) and lowest energy isomers(ISO1, ISO2) for a) $\text{Re}_5$ , b) $\text{Re}_4\text{Pt}_1$ , and c) $\text{Re}_3\text{Pt}_2$ clusters supported on $\text{TiO}_2(110)$ . The relative energy and total magnetization are presented below each structure . . . . .                                                                                                                                                                                                                             | 6 |
| S3 | Putative global minima(GM) and lowest energy isomers(ISO1, ISO2) for a) $\text{Re}_2\text{Pt}_3$ , b) $\text{Re}_1\text{Pt}_4$ , and c) $\text{Pt}_5$ clusters supported on $\text{TiO}_2(110)$ . The relative energy and total magnetization are presented below each structure . . . . .                                                                                                                                                                                                                             | 7 |
| S4 | The most stable structures for $\text{O}_2$ dissociation on gas-phase (left) and supported (right) $\text{Re}_n\text{Pt}_m$ ( $n + m = 5$ ) clusters : a) $\text{Re}_5$ , b) $\text{Re}_4\text{Pt}_1$ , c) $\text{Re}_3\text{Pt}_2$ , d) $\text{Re}_2\text{Pt}_3$ , e) $\text{Re}_1\text{Pt}_4$ . The dissociative adsorption energy of $\text{O}_2$ is displayed below each structure in eV. The structure of the supported clusters is simplified by showing only the surface trilayer for ease of analysis. . . . . | 8 |
| S5 | The most stable structures for dissociative adsorption on the interface Re-Ti of $\text{Re}_5$ (left) and $\text{Re}_4\text{Pt}_1$ (right) supported on $\text{TiO}_2(110)$ surface. Adsorption of $\text{O}_2$ at the Re-Ti interface is prone to dissociation, leading to the formation of atomic oxygen. The adsorption energy is displayed below each structure in eV. . . . .                                                                                                                                     | 9 |
| S6 | The lattice distortions caused by the formation of small polarons on the $\text{TiO}_2(110)$ surface. The left side shows the distortion for the substrate of the $\text{Re}_5$ cluster. The right side shows the Ti-O lengths for the lattice distortion of the Re-Pt clusters supported on $\text{TiO}_2(110)$ . . . . .                                                                                                                                                                                             | 9 |

## 1. O<sub>2</sub> activation on Pt<sub>n</sub>Re<sub>m</sub> (n + m = 5) clusters supported on TiO<sub>2</sub>(110)

Table S1: Bader charge analysis of supported Re<sub>n</sub>Pt<sub>m</sub> clusters on TiO<sub>2</sub>(110). The charge for the cluster atoms is reported both before and after O<sub>2</sub> adsorption, as well as the difference between the two. The charges of the atoms are listed in order, starting with the Re atoms and continuing with the Pt atoms.

| Supported Cluster               | O <sub>2</sub> adsorption | Q[cluster atoms] (e)             | Total cluster charge (e) |
|---------------------------------|---------------------------|----------------------------------|--------------------------|
| Re <sub>5</sub>                 | Before                    | 0.52, -0.07, 0.60, 0.48, 0.52    | 2.06                     |
|                                 | After                     | 0.52, 0.21, 0.97, 0.54, 0.82     | 3.06                     |
|                                 | Difference                | 0.00, 0.28, 0.36, 0.06, 0.30     | 1.00                     |
| Re <sub>4</sub> Pt <sub>1</sub> | Before                    | 0.42, 0.56, 0.75, 0.46, -0.45    | 1.74                     |
|                                 | After                     | 0.44, 1.18, 0.78, 0.47, -0.39    | 2.48                     |
|                                 | Difference                | 0.02, 0.62, 0.03, 0.01, 0.06     | 0.74                     |
| Re <sub>3</sub> Pt <sub>2</sub> | Before                    | 0.56, 0.91, 0.39, -0.33, -0.26   | 1.27                     |
|                                 | After                     | 0.81, 0.55, 1.14, -0.39, -0.41   | 1.70                     |
|                                 | Difference                | 0.25, -0.36, 0.75, -0.06, -0.15  | 0.43                     |
| Re <sub>2</sub> Pt <sub>3</sub> | Before                    | 0.84, 1.03, -0.31, -0.33, -0.08  | 1.15                     |
|                                 | After                     | 1.37, 1.15, -0.25, -0.36, -0.06  | 1.85                     |
|                                 | Difference                | 0.53, 0.12, 0.06, -0.03, 0.02    | 0.70                     |
| Re <sub>1</sub> Pt <sub>4</sub> | Before                    | 1.31, -0.25, -0.03, -0.22, -0.11 | 0.70                     |
|                                 | After                     | 1.31, -0.18, -0.21, 0.21, -0.04  | 1.09                     |
|                                 | Difference                | 0.00, 0.07, -0.18, 0.43, 0.07    | 0.39                     |
| Pt <sub>5</sub>                 | Before                    | -0.05, 0.15, 0.06, 0.00, 0.09    | 0.25                     |
|                                 | After                     | -0.04, 0.42, 0.01, 0.31, 0.02    | 0.72                     |
|                                 | Difference                | 0.01, 0.27, -0.05, 0.31, -0.07   | 0.47                     |

Table S2: The adsorption of O<sub>2</sub> on the surface site of Re-Pt clusters supported on TiO<sub>2</sub>(110). The adsorption mode, adsorption energy ( $E_{ads}$ ), and the height of the Ti atoms binding to the molecule are displayed.

| Supported system                | Adsorption mode | $E_{ads}$ | Height-Ti <sub>5c</sub> |
|---------------------------------|-----------------|-----------|-------------------------|
| Re <sub>5</sub>                 | $\eta^2$ -Ti    | 1.35      | 1.12                    |
| Re <sub>4</sub> Pt <sub>1</sub> | $\eta^2$ -Ti    | 1.41      | 1.08                    |
| Re <sub>3</sub> Pt <sub>2</sub> | $\mu_2$ -Ti     | 1.55      | 0.00                    |
| Re <sub>2</sub> Pt <sub>3</sub> | $\eta^2$ -Ti    | 1.32      | 1.10                    |
| Re <sub>1</sub> Pt <sub>4</sub> | $\mu_2$ -Ti     | 1.17      | 0.00                    |
| Pt <sub>5</sub>                 | $\eta^2$ -Ti    | 0.93      | 1.06                    |

Table S3: Total charge transferred to the O<sub>2</sub> molecule (Q[O<sub>2</sub>]), charge transferred from the cluster to the O<sub>2</sub> molecule ( $\Delta Q[\text{cluster}]$ ), and charge transferred from the surface to the O<sub>2</sub> molecule ( $\Delta Q[\text{surface}]$ ). The Bader charge is shown in e.

| Sites              | Charges                    | Re <sub>5</sub> | Re <sub>4</sub> Pt <sub>1</sub> | Re <sub>3</sub> Pt <sub>2</sub> | Re <sub>2</sub> Pt <sub>3</sub> | Re <sub>1</sub> Pt <sub>4</sub> | Pt <sub>5</sub> |
|--------------------|----------------------------|-----------------|---------------------------------|---------------------------------|---------------------------------|---------------------------------|-----------------|
| Supported clusters | Q[O <sub>2</sub> ]         | -0.99           | -0.78                           | -0.62                           | -0.80                           | -0.44                           | -0.59           |
|                    | $\Delta Q[\text{cluster}]$ | 1.00            | 0.74                            | 0.47                            | 0.70                            | 0.39                            | 0.48            |
|                    | $\Delta Q[\text{surface}]$ | -0.01           | 0.04                            | 0.15                            | 0.10                            | 0.05                            | 0.11            |
| Surface            | Q[O <sub>2</sub> ]         | -0.94           | -0.94                           | -0.88                           | -0.96                           | -0.89                           | -0.94           |
|                    | $\Delta Q[\text{cluster}]$ | 0.25            | 0.04                            | 0.24                            | 0.43                            | 0.43                            | 0.68            |
|                    | $\Delta Q[\text{surface}]$ | 0.69            | 0.90                            | 0.64                            | 0.53                            | 0.46                            | 0.26            |
| Interface          | Q[O <sub>2</sub> ]         | -               | -                               | -0.88                           | -0.83                           | -0.85                           | -0.83           |
|                    | $\Delta Q[\text{cluster}]$ | -               | -                               | 0.47                            | 0.66                            | 0.68                            | 0.62            |
|                    | $\Delta Q[\text{surface}]$ | -               | -                               | 0.41                            | 0.17                            | 0.17                            | 0.21            |

Table S4: The effect of the temperature (T = 300 K) on reaction energies for the O<sub>2</sub> dissociation on gas-phase Re-Pt clusters

| Gas-phase clusters              | $\Delta E$ [T = 0 K] (eV) | $\Delta G$ [T = 300 K] (eV) | Thermal Correction (eV) |
|---------------------------------|---------------------------|-----------------------------|-------------------------|
| Re <sub>5</sub>                 | -3.52                     | -3.50                       | 0.02                    |
| Re <sub>4</sub> Pt <sub>1</sub> | -3.23                     | -3.35                       | -0.12                   |
| Re <sub>3</sub> Pt <sub>2</sub> | -2.87                     | -2.92                       | -0.05                   |
| Re <sub>2</sub> Pt <sub>3</sub> | -2.87                     | -2.92                       | -0.05                   |
| Re <sub>1</sub> Pt <sub>4</sub> | -2.84                     | -2.76                       | 0.08                    |
| Pt <sub>5</sub>                 | -0.44                     | -0.50                       | -0.06                   |



## 2. Structure and properties of $\text{Pt}_n\text{Re}_m$ ( $n + m = 5$ ) clusters supported on $\text{TiO}_2(110)$

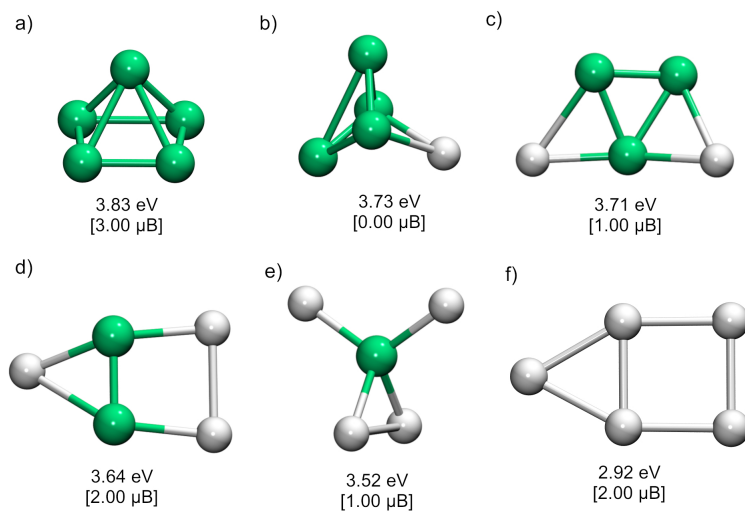

Figure S1: Global minima configurations for gas-phase  $\text{Re}_n\text{Pt}_m$  ( $n + m = 5$ ): a)  $\text{Re}_5$ , b)  $\text{Re}_4\text{Pt}_1$ , c)  $\text{Re}_3\text{Pt}_2$ , d)  $\text{Re}_2\text{Pt}_3$ , e)  $\text{Re}_1\text{Pt}_4$ , f)  $\text{Pt}_5$ . The binding energy and magnetization are shown below each structure.

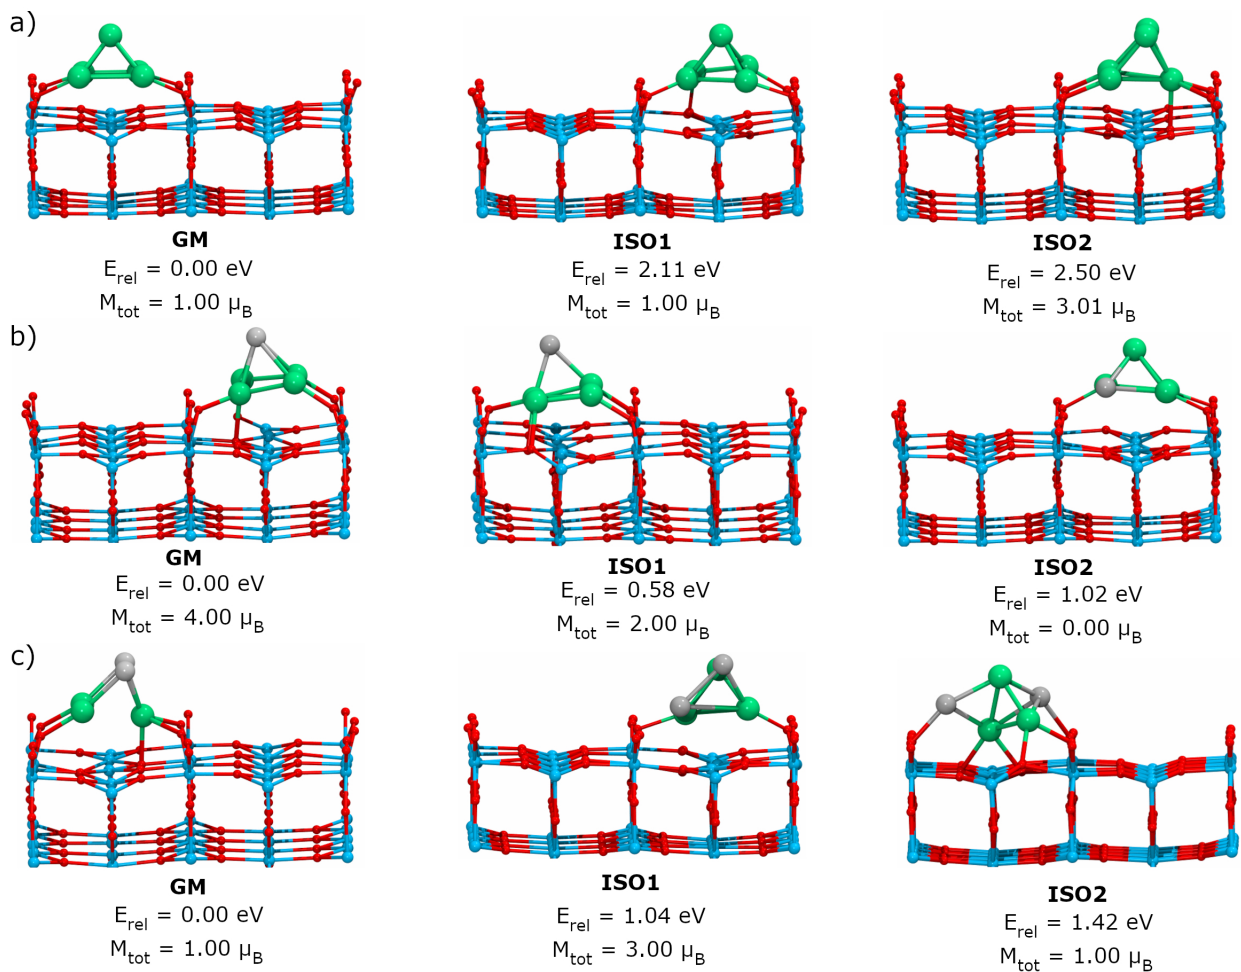

Figure S2: Putative global minima(GM) and lowest energy isomers(ISO1, ISO2) for a)  $\text{Re}_5$ , b)  $\text{Re}_4\text{Pt}_1$ , and c)  $\text{Re}_3\text{Pt}_2$  clusters supported on  $\text{TiO}_2(110)$ . The relative energy and total magnetization are presented below each structure

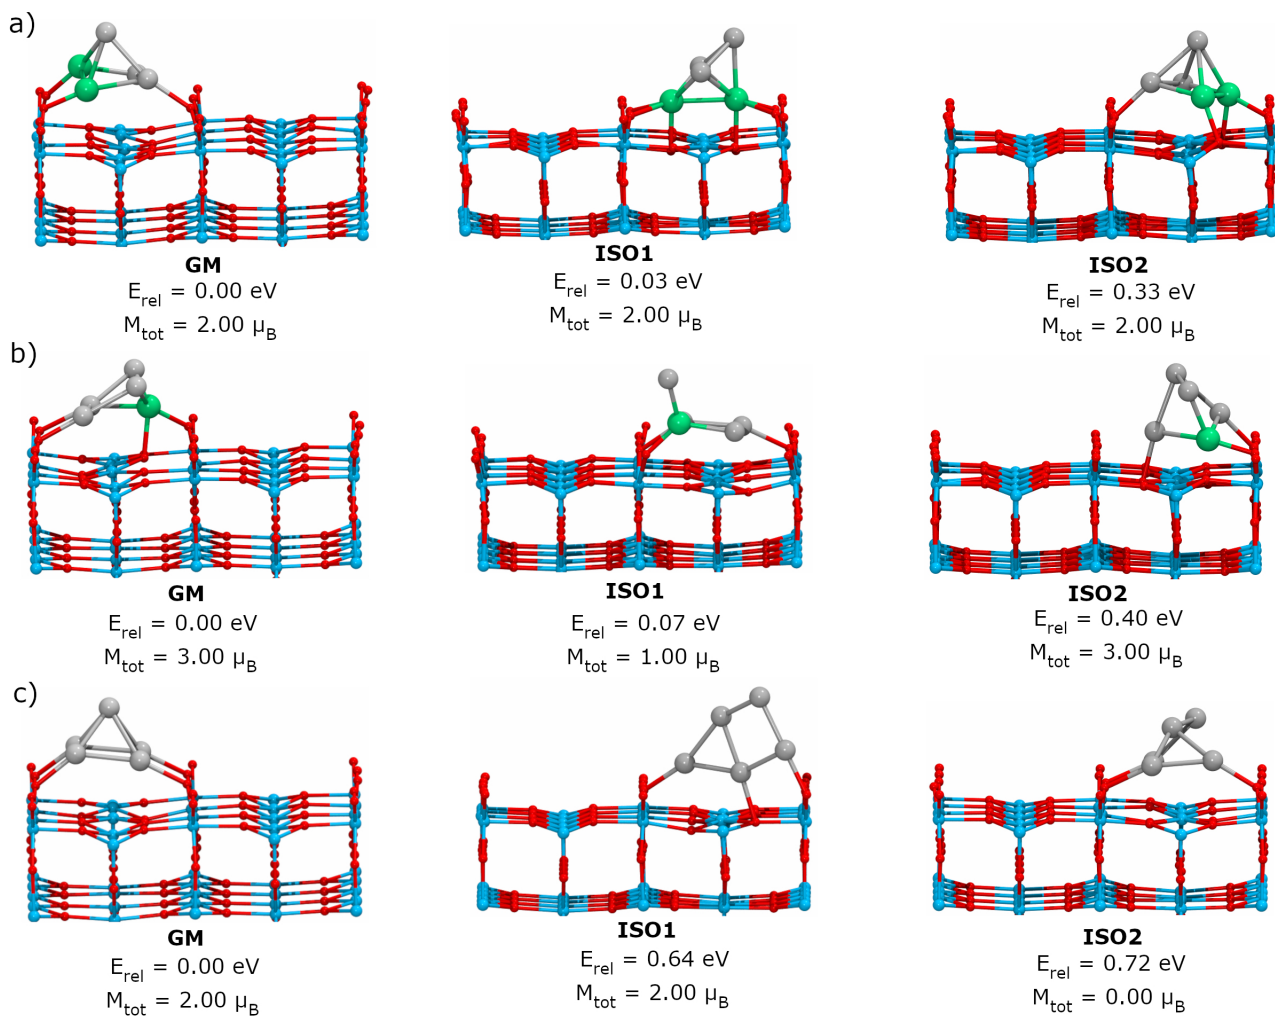

Figure S3: Putative global minima(GM) and lowest energy isomers(ISO1, ISO2) for a)  $\text{Re}_2\text{Pt}_3$ , b)  $\text{Re}_1\text{Pt}_4$ , and c)  $\text{Pt}_5$  clusters supported on  $\text{TiO}_2(110)$ . The relative energy and total magnetization are presented below each structure

### 3. O<sub>2</sub> dissociation on Pt<sub>n</sub>Re<sub>m</sub> (n + m = 5) clusters supported on TiO<sub>2</sub>(110)

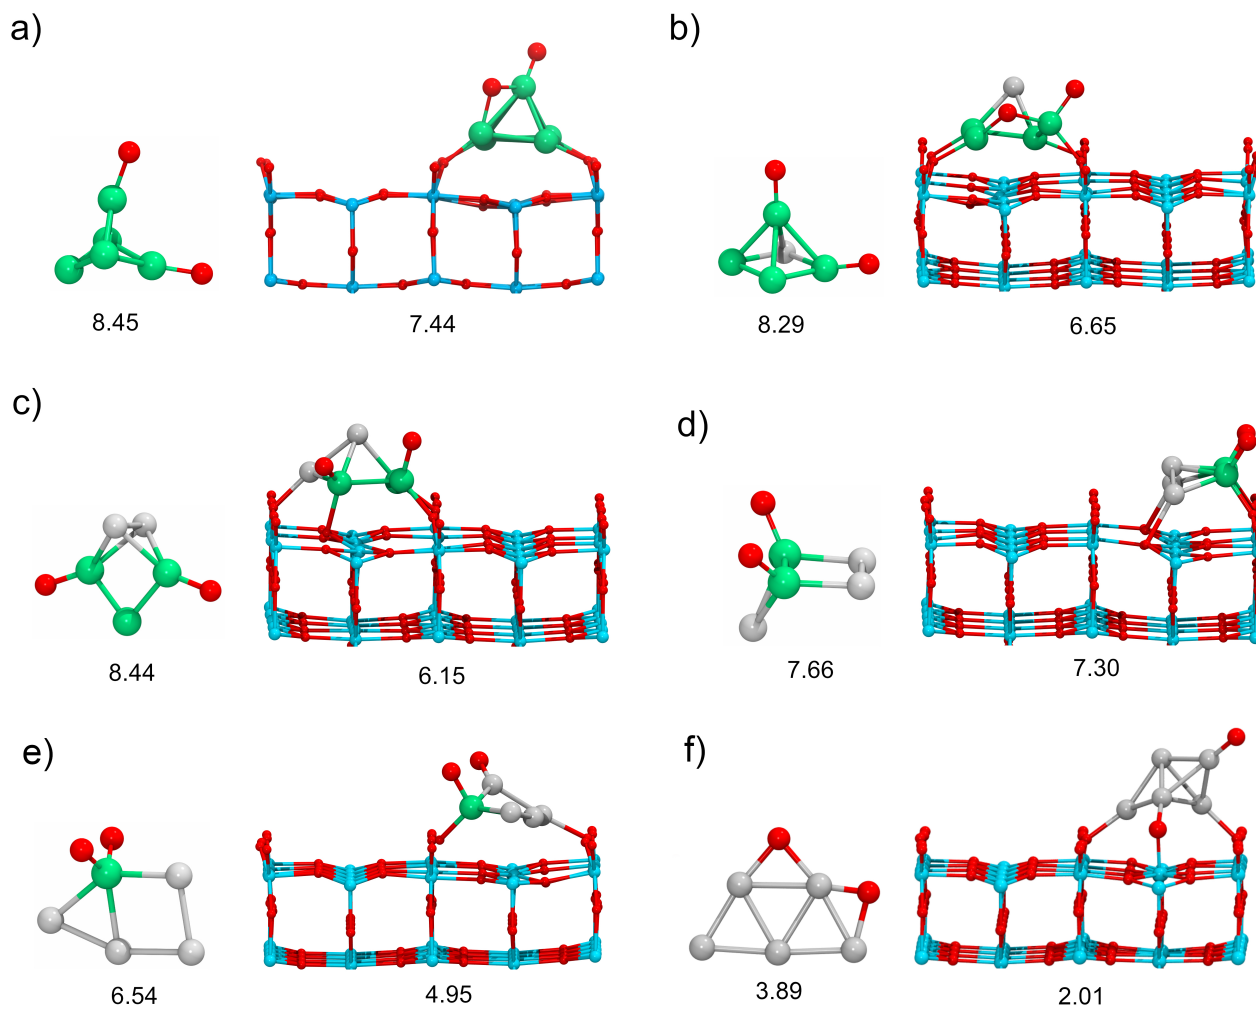

Figure S4: The most stable structures for O<sub>2</sub> dissociation on gas-phase (left) and supported (right) Re<sub>n</sub>Pt<sub>m</sub> (n + m = 5) clusters : a) Re<sub>5</sub>, b) Re<sub>4</sub>Pt<sub>1</sub>, c) Re<sub>3</sub>Pt<sub>2</sub>, d) Re<sub>2</sub>Pt<sub>3</sub>, e) Re<sub>1</sub>Pt<sub>4</sub>. The dissociative adsorption energy of O<sub>2</sub> is displayed below each structure in eV. The structure of the supported clusters is simplified by showing only the surface trilayer for ease of analysis.

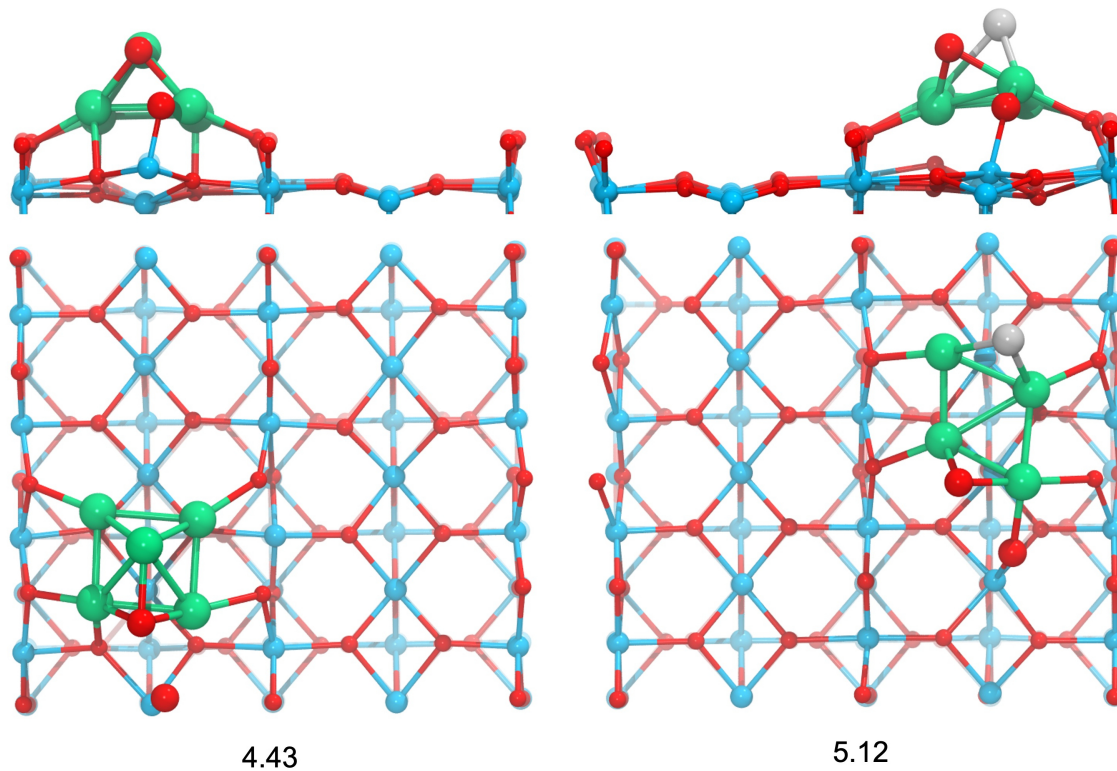

Figure S5: The most stable structures for dissociative adsorption on the interface Re-Ti of  $\text{Re}_5$  (left) and  $\text{Re}_4\text{Pt}_1$  (right) supported on  $\text{TiO}_2(110)$  surface. Adsorption of  $\text{O}_2$  at the Re-Ti interface is prone to dissociation, leading to the formation of atomic oxygen. The adsorption energy is displayed below each structure in eV.

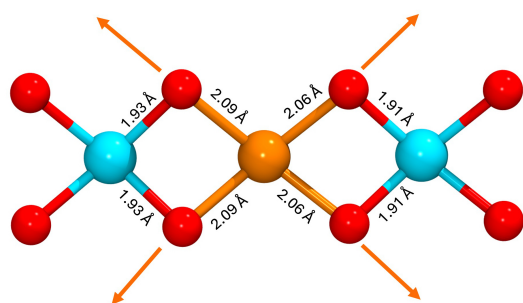

| Supported Cluster        | Ti-O length (Å)        |
|--------------------------|------------------------|
| $\text{Re}_5$            | 2.09, 2.09, 2.06, 2.06 |
| $\text{Re}_4\text{Pt}_1$ | 2.10, 2.08, 2.08, 2.06 |
| $\text{Re}_3\text{Pt}_2$ | 2.09, 2.06, 2.06, 2.06 |
| $\text{Re}_1\text{Pt}_4$ | 2.09, 2.07, 2.06, 2.06 |

Figure S6: The lattice distortions caused by the formation of small polarons on the  $\text{TiO}_2(110)$  surface. The left side shows the distortion for the substrate of the  $\text{Re}_5$  cluster. The right side shows the Ti-O lengths for the lattice distortion of the Re-Pt clusters supported on  $\text{TiO}_2(110)$ .
